# Supplementary material for: Comprehensive Lipidome Profiling of the Kidney in Early-Stage Diabetic Nephropathy
Source: PubMed Central journal article supplement (PMC7325916; doi:10.3389/fendo.2020.00359), 2020-06-19
Supplement: Table_1.pdf [file Table_1.pdf]

Table 1 lipidomic results of diabetic kidney cortex and normal kidney cortex

| Concentration<br>( $\mu\text{mol/g}$ ) | NC      |         |         |         |         |         | DN      |         |         |         |         |         |
|----------------------------------------|---------|---------|---------|---------|---------|---------|---------|---------|---------|---------|---------|---------|
|                                        | NC1     | NC2     | NC3     | NC4     | NC5     | NC6     | DN1     | DN2     | DN3     | DN4     | DN5     | DN6     |
| DAG32:2(16:1/16:1)                     | 0.02377 | 0.02441 | 0.02528 | 0.02125 | 0.02774 | 0.02717 | 0.02315 | 0.02311 | 0.02283 | 0.02383 | 0.02343 | 0.01901 |
| DAG32:1(16:1/16:0)                     | 0.01851 | 0.02147 | 0.02047 | 0.01891 | 0.02135 | 0.02328 | 0.01837 | 0.01780 | 0.01764 | 0.02122 | 0.01978 | 0.02112 |
| DAG34:2(16:0/18:2)                     | 0.11017 | 0.12790 | 0.10328 | 0.09389 | 0.10710 | 0.12703 | 0.13672 | 0.13693 | 0.14823 | 0.14120 | 0.12801 | 0.12617 |
| DAG34:1(16:0/18:1)                     | 0.09315 | 0.11403 | 0.10500 | 0.10246 | 0.11506 | 0.11733 | 0.15324 | 0.16905 | 0.17916 | 0.17285 | 0.16004 | 0.16107 |
| DAG36:4(18:2/18:2)                     | 0.34081 | 0.42052 | 0.35377 | 0.35098 | 0.38015 | 0.38769 | 0.35604 | 0.38514 | 0.41412 | 0.39004 | 0.37414 | 0.38206 |
| DAG36:3(18:2/18:1)                     | 0.10126 | 0.11016 | 0.09036 | 0.08933 | 0.10288 | 0.10284 | 0.17280 | 0.21077 | 0.18568 | 0.20604 | 0.19820 | 0.19253 |
| DAG36:2(18:1/18:1)                     | 0.48070 | 0.55042 | 0.49205 | 0.47490 | 0.51620 | 0.56724 | 0.60676 | 0.65681 | 0.68316 | 0.68298 | 0.63468 | 0.63961 |
| DAG36:2(18:2/18:0)                     | 0.11177 | 0.13764 | 0.12250 | 0.11291 | 0.13411 | 0.14307 | 0.19888 | 0.22059 | 0.22518 | 0.22892 | 0.21625 | 0.22565 |
| DAG36:1(18:1/18:0)                     | 0.15132 | 0.18752 | 0.16139 | 0.15129 | 0.17693 | 0.18459 | 0.25855 | 0.27063 | 0.28498 | 0.28974 | 0.25796 | 0.26323 |
| DAG38:6(18:1/20:5)                     | 0.02617 | 0.02667 | 0.02528 | 0.02547 | 0.02690 | 0.02717 | 0.02250 | 0.02427 | 0.02779 | 0.02703 | 0.02644 | 0.02579 |
| DAG38:4(18:0/20:4)                     | 0.16195 | 0.20352 | 0.17191 | 0.17465 | 0.19731 | 0.19016 | 0.11009 | 0.11844 | 0.12588 | 0.12460 | 0.11533 | 0.11549 |
| DAG40:6(18:0/22:6)                     | 0.26344 | 0.37131 | 0.37939 | 0.32161 | 0.26582 | 0.26557 | 0.32854 | 0.23122 | 0.36785 | 0.30918 | 0.34007 | 0.29813 |
| DAG40:5(18:0/22:5)                     | 0.05406 | 0.08336 | 0.08270 | 0.06586 | 0.05656 | 0.06610 | 0.06238 | 0.06251 | 0.07647 | 0.06757 | 0.06718 | 0.06492 |
| TAG48:4(18:2)                          | 0.00122 | 0.00122 | 0.00043 | 0.00106 | 0.00184 | 0.00175 | 0.00113 | 0.00153 | 0.00140 | 0.00154 | 0.00199 | 0.00063 |
| TAG48:4(16:1)                          | 0.00329 | 0.00261 | 0.00268 | 0.00274 | 0.00289 | 0.00341 | 0.00253 | 0.00322 | 0.00428 | 0.00279 | 0.00306 | 0.00325 |
| TAG48:3(18:2)                          | 0.00107 | 0.00171 | 0.00156 | 0.00186 | 0.00281 | 0.00070 | 0.00122 | 0.00225 | 0.00166 | 0.00154 | 0.00252 | 0.00111 |
| TAG48:3(18:1)                          | 0.00405 | 0.00350 | 0.00502 | 0.00495 | 0.00438 | 0.00446 | 0.00497 | 0.00451 | 0.00446 | 0.00463 | 0.00405 | 0.00467 |
| TAG48:3(16:1)                          | 0.00604 | 0.00570 | 0.00476 | 0.00628 | 0.00605 | 0.00568 | 0.00785 | 0.00499 | 0.00638 | 0.00529 | 0.00527 | 0.00364 |
| TAG48:3(16:0)                          | 0.00199 | 0.00163 | 0.00156 | 0.00247 | 0.00228 | 0.00192 | 0.00323 | 0.00330 | 0.00367 | 0.00279 | 0.00267 | 0.00285 |
| TAG48:2(18:2)                          | 0.00252 | 0.00326 | 0.00398 | 0.00212 | 0.00272 | 0.00341 | 0.00890 | 0.00821 | 0.00664 | 0.00618 | 0.00672 | 0.00919 |

|               |         |         |         |         |         |         |         |         |         |         |         |         |
|---------------|---------|---------|---------|---------|---------|---------|---------|---------|---------|---------|---------|---------|
| TAG48:2(18:1) | 0.00811 | 0.01067 | 0.00649 | 0.00955 | 0.00815 | 0.00971 | 0.01030 | 0.00861 | 0.01014 | 0.00632 | 0.00825 | 0.00737 |
| TAG48:2(16:1) | 0.00199 | 0.00204 | 0.00268 | 0.00194 | 0.00210 | 0.00201 | 0.00445 | 0.00330 | 0.00280 | 0.00294 | 0.00328 | 0.00325 |
| TAG48:2(16:0) | 0.00382 | 0.00423 | 0.00433 | 0.00468 | 0.00351 | 0.00359 | 0.00750 | 0.00813 | 0.01005 | 0.00588 | 0.00894 | 0.00982 |
| TAG48:1(18:0) | 0.00092 | 0.00106 | 0.00216 | 0.00062 | 0.00140 | 0.00122 | 0.00236 | 0.00137 | 0.00227 | 0.00081 | 0.00244 | 0.00111 |
| TAG48:1(18:1) | 0.00903 | 0.00798 | 0.01013 | 0.00778 | 0.00938 | 0.00726 | 0.01466 | 0.01522 | 0.01905 | 0.01243 | 0.01497 | 0.01568 |
| TAG48:1(16:0) | 0.00642 | 0.00635 | 0.00598 | 0.00460 | 0.00903 | 0.00787 | 0.01632 | 0.01964 | 0.01818 | 0.01500 | 0.01581 | 0.01442 |
| TAG48:1(16:1) | 0.00413 | 0.00285 | 0.00407 | 0.00442 | 0.00386 | 0.00437 | 0.00620 | 0.00668 | 0.00795 | 0.00640 | 0.00657 | 0.00642 |
| TAG50:4(18:2) | 0.00092 | 0.00204 | 0.00251 | 0.00150 | 0.00175 | 0.00184 | 0.00157 | 0.00201 | 0.00315 | 0.00110 | 0.00191 | 0.00356 |
| TAG50:4(16:2) | 0.00153 | 0.00090 | 0.00121 | 0.00080 | 0.00096 | 0.00114 | 0.00061 | 0.00113 | 0.00149 | 0.00103 | 0.00092 | 0.00055 |
| TAG50:3(18:2) | 0.00352 | 0.00326 | 0.00407 | 0.00265 | 0.00377 | 0.00472 | 0.00611 | 0.00564 | 0.00481 | 0.00588 | 0.00688 | 0.00618 |
| TAG50:3(18:1) | 0.00382 | 0.00285 | 0.00546 | 0.00433 | 0.00447 | 0.00647 | 0.00777 | 0.00419 | 0.00551 | 0.00581 | 0.00497 | 0.00737 |
| TAG50:3(16:0) | 0.00314 | 0.00456 | 0.00537 | 0.00574 | 0.00377 | 0.00446 | 0.00934 | 0.00934 | 0.00778 | 0.00816 | 0.00802 | 0.00713 |
| TAG50:3(16:1) | 0.00421 | 0.00342 | 0.00433 | 0.00486 | 0.00412 | 0.00376 | 0.00593 | 0.00789 | 0.00551 | 0.00559 | 0.00871 | 0.00713 |
| TAG50:3(16:2) | 0.00061 | 0.00065 | 0.00052 | 0.00088 | 0.00070 | 0.00087 | 0.00166 | 0.00113 | 0.00149 | 0.00110 | 0.00191 | 0.00143 |
| TAG50:2(18:2) | 0.01476 | 0.01889 | 0.02390 | 0.02236 | 0.02200 | 0.02230 | 0.05680 | 0.06553 | 0.07360 | 0.06176 | 0.06050 | 0.06519 |
| TAG50:2(18:1) | 0.00627 | 0.00879 | 0.00805 | 0.00893 | 0.00798 | 0.00813 | 0.01213 | 0.01361 | 0.01512 | 0.01272 | 0.01008 | 0.01363 |
| TAG50:2(16:0) | 0.03258 | 0.03445 | 0.03403 | 0.03677 | 0.03428 | 0.03778 | 0.11282 | 0.10135 | 0.11730 | 0.11698 | 0.10947 | 0.11542 |
| TAG50:2(16:1) | 0.00314 | 0.00342 | 0.00520 | 0.00362 | 0.00508 | 0.00455 | 0.00855 | 0.01095 | 0.00944 | 0.00691 | 0.01062 | 0.00729 |
| TAG50:2(16:2) | 0.00038 | 0.00041 | 0.00035 | 0.00027 | 0.00035 | 0.00052 | 0.00096 | 0.00137 | 0.00157 | 0.00088 | 0.00046 | 0.00079 |
| TAG50:1(16:1) | 0.00176 | 0.00179 | 0.00069 | 0.00159 | 0.00114 | 0.00079 | 0.00358 | 0.00443 | 0.00358 | 0.00324 | 0.00367 | 0.00412 |
| TAG50:1(16:0) | 0.02256 | 0.03787 | 0.03481 | 0.04074 | 0.03691 | 0.03603 | 0.16587 | 0.15457 | 0.15934 | 0.13353 | 0.15417 | 0.15764 |
| TAG50:1(18:0) | 0.00176 | 0.00195 | 0.00182 | 0.00221 | 0.00219 | 0.00140 | 0.00558 | 0.00386 | 0.00516 | 0.00500 | 0.00413 | 0.00594 |
| TAG50:1(18:1) | 0.02187 | 0.02508 | 0.02511 | 0.02908 | 0.02831 | 0.02799 | 0.10060 | 0.10264 | 0.11258 | 0.09110 | 0.09794 | 0.10052 |
| TAG52:4(16:0) | 0.00811 | 0.00912 | 0.01117 | 0.00857 | 0.00929 | 0.01268 | 0.01579 | 0.01610 | 0.01827 | 0.01353 | 0.01566 | 0.01465 |

|               |         |         |         |         |         |         |         |         |         |         |         |         |
|---------------|---------|---------|---------|---------|---------|---------|---------|---------|---------|---------|---------|---------|
| TAG52:4(16:1) | 0.00184 | 0.00187 | 0.00268 | 0.00380 | 0.00202 | 0.00227 | 0.00227 | 0.00290 | 0.00332 | 0.00441 | 0.00313 | 0.00293 |
| TAG52:4(16:2) | 0.00099 | 0.00049 | 0.00113 | 0.00133 | 0.00079 | 0.00105 | 0.00113 | 0.00064 | 0.00052 | 0.00059 | 0.00099 | 0.00087 |
| TAG52:4(18:1) | 0.00543 | 0.00497 | 0.00779 | 0.00619 | 0.00587 | 0.00490 | 0.00768 | 0.00716 | 0.00656 | 0.00654 | 0.00474 | 0.00610 |
| TAG52:4(18:2) | 0.00964 | 0.01409 | 0.01576 | 0.01432 | 0.01306 | 0.01084 | 0.02940 | 0.02697 | 0.02771 | 0.02515 | 0.02613 | 0.02646 |
| TAG52:4(18:3) | 0.00252 | 0.00130 | 0.00199 | 0.00362 | 0.00175 | 0.00166 | 0.00515 | 0.00362 | 0.00420 | 0.00346 | 0.00390 | 0.00261 |
| TAG52:3(16:0) | 0.01300 | 0.01531 | 0.01749 | 0.01865 | 0.01929 | 0.01565 | 0.04275 | 0.04226 | 0.04799 | 0.03801 | 0.04729 | 0.04159 |
| TAG52:3(16:1) | 0.00283 | 0.00171 | 0.00398 | 0.00186 | 0.00237 | 0.00350 | 0.00489 | 0.00467 | 0.00428 | 0.00419 | 0.00428 | 0.00436 |
| TAG52:3(16:2) | 0.00069 | 0.00122 | 0.00052 | 0.00088 | 0.00123 | 0.00105 | 0.00070 | 0.00072 | 0.00087 | 0.00074 | 0.00115 | 0.00143 |
| TAG52:3(18:1) | 0.01706 | 0.01906 | 0.02026 | 0.02112 | 0.01999 | 0.02108 | 0.05148 | 0.04814 | 0.05349 | 0.04485 | 0.05531 | 0.05054 |
| TAG52:3(18:2) | 0.01361 | 0.01555 | 0.01715 | 0.01723 | 0.01341 | 0.01618 | 0.04546 | 0.04645 | 0.04598 | 0.04625 | 0.04782 | 0.04690 |
| TAG52:2(18:2) | 0.00314 | 0.00554 | 0.00675 | 0.00566 | 0.00508 | 0.00472 | 0.03193 | 0.02729 | 0.03339 | 0.02456 | 0.02544 | 0.03295 |
| TAG52:2(18:1) | 0.02126 | 0.02435 | 0.02875 | 0.02793 | 0.02709 | 0.02580 | 0.09197 | 0.08606 | 0.09519 | 0.07169 | 0.09045 | 0.08389 |
| TAG52:2(16:0) | 0.01117 | 0.01344 | 0.01784 | 0.01944 | 0.01508 | 0.01408 | 0.06265 | 0.05828 | 0.06695 | 0.05897 | 0.05233 | 0.06179 |
| TAG52:2(16:1) | 0.00145 | 0.00114 | 0.00173 | 0.00062 | 0.00114 | 0.00184 | 0.00148 | 0.00266 | 0.00411 | 0.00235 | 0.00252 | 0.00206 |
| TAG52:1(18:1) | 0.00895 | 0.01018 | 0.01325 | 0.01343 | 0.01254 | 0.01006 | 0.04886 | 0.04436 | 0.04528 | 0.04676 | 0.04683 | 0.04119 |
| TAG52:1(16:1) | 0.00145 | 0.00090 | 0.00191 | 0.00141 | 0.00044 | 0.00122 | 0.00148 | 0.00137 | 0.00201 | 0.00044 | 0.00290 | 0.00111 |
| TAG54:8(20:4) | 0.00088 | 0.00094 | 0.00069 | 0.00075 | 0.00074 | 0.00108 | 0.00055 | 0.00088 | 0.00159 | 0.00084 | 0.00062 | 0.00036 |
| TAG54:8(18:3) | 0.00088 | 0.00102 | 0.00145 | 0.00097 | 0.00133 | 0.00100 | 0.00195 | 0.00081 | 0.00106 | 0.00126 | 0.00180 | 0.00094 |
| TAG54:8(22:6) | 0.00102 | 0.00071 | 0.00107 | 0.00149 | 0.00169 | 0.00091 | 0.00187 | 0.00168 | 0.00061 | 0.00147 | 0.00111 | 0.00144 |
| TAG54:7(22:6) | 0.00129 | 0.00189 | 0.00214 | 0.00179 | 0.00184 | 0.00174 | 0.00179 | 0.00146 | 0.00151 | 0.00147 | 0.00076 | 0.00216 |
| TAG54:7(20:4) | 0.00211 | 0.00071 | 0.00214 | 0.00194 | 0.00059 | 0.00141 | 0.00148 | 0.00110 | 0.00144 | 0.00049 | 0.00090 | 0.00079 |
| TAG54:7(18:2) | 0.00109 | 0.00134 | 0.00161 | 0.00246 | 0.00125 | 0.00108 | 0.00125 | 0.00220 | 0.00348 | 0.00161 | 0.00131 | 0.00281 |
| TAG54:7(18:3) | 0.00122 | 0.00220 | 0.00253 | 0.00179 | 0.00324 | 0.00216 | 0.00234 | 0.00220 | 0.00265 | 0.00238 | 0.00262 | 0.00209 |
| TAG54:6(20:4) | 0.00252 | 0.00228 | 0.00276 | 0.00381 | 0.00354 | 0.00274 | 0.00444 | 0.00432 | 0.00234 | 0.00328 | 0.00380 | 0.00425 |

|               |         |         |         |         |         |         |         |         |         |         |         |         |
|---------------|---------|---------|---------|---------|---------|---------|---------|---------|---------|---------|---------|---------|
| TAG54:6(18:2) | 0.00768 | 0.01022 | 0.01263 | 0.01165 | 0.00928 | 0.01294 | 0.01247 | 0.01018 | 0.01119 | 0.01272 | 0.01078 | 0.01383 |
| TAG54:6(18:3) | 0.00279 | 0.00354 | 0.00199 | 0.00261 | 0.00243 | 0.00365 | 0.00405 | 0.00359 | 0.00325 | 0.00370 | 0.00380 | 0.00317 |
| TAG54:5(20:4) | 0.00252 | 0.00267 | 0.00230 | 0.00187 | 0.00273 | 0.00315 | 0.00499 | 0.00498 | 0.00575 | 0.00356 | 0.00504 | 0.00511 |
| TAG54:5(18:1) | 0.01509 | 0.01878 | 0.01951 | 0.02053 | 0.01812 | 0.01650 | 0.02657 | 0.02819 | 0.02398 | 0.02418 | 0.02127 | 0.02600 |
| TAG54:5(18:2) | 0.01360 | 0.02232 | 0.02495 | 0.01986 | 0.01613 | 0.02189 | 0.02759 | 0.02943 | 0.02700 | 0.02775 | 0.02397 | 0.03003 |
| TAG54:5(18:3) | 0.00347 | 0.00385 | 0.00490 | 0.00336 | 0.00317 | 0.00340 | 0.00390 | 0.00505 | 0.00484 | 0.00349 | 0.00518 | 0.00418 |
| TAG54:5(16:0) | 0.00122 | 0.00189 | 0.00245 | 0.00202 | 0.00206 | 0.00282 | 0.00335 | 0.00381 | 0.00325 | 0.00294 | 0.00311 | 0.00281 |
| TAG54:5(16:1) | 0.00109 | 0.00063 | 0.00084 | 0.00090 | 0.00052 | 0.00124 | 0.00148 | 0.00124 | 0.00091 | 0.00049 | 0.00111 | 0.00086 |
| TAG54:5(16:2) | 0.00034 | 0.00086 | 0.00077 | 0.00075 | 0.00059 | 0.00017 | 0.00094 | 0.00022 | 0.00038 | 0.00035 | 0.00035 | 0.00043 |
| TAG54:4(18:3) | 0.00163 | 0.00157 | 0.00138 | 0.00164 | 0.00265 | 0.00232 | 0.00390 | 0.00308 | 0.00219 | 0.00294 | 0.00283 | 0.00295 |
| TAG54:4(18:2) | 0.02801 | 0.03269 | 0.03704 | 0.03434 | 0.03381 | 0.04155 | 0.07552 | 0.08406 | 0.07374 | 0.07408 | 0.07487 | 0.06374 |
| TAG54:4(18:1) | 0.06227 | 0.06924 | 0.07033 | 0.06458 | 0.06623 | 0.06618 | 0.10949 | 0.09921 | 0.09901 | 0.09896 | 0.09912 | 0.09377 |
| TAG54:4(18:0) | 0.00483 | 0.00456 | 0.00597 | 0.00605 | 0.00545 | 0.00672 | 0.01691 | 0.01889 | 0.01936 | 0.01810 | 0.01844 | 0.01764 |
| TAG54:4(16:0) | 0.00292 | 0.00173 | 0.00276 | 0.00351 | 0.00287 | 0.00224 | 0.00694 | 0.00483 | 0.00499 | 0.00468 | 0.00504 | 0.00497 |
| TAG54:4(16:1) | 0.00095 | 0.00086 | 0.00069 | 0.00030 | 0.00066 | 0.00041 | 0.00039 | 0.00051 | 0.00091 | 0.00084 | 0.00090 | 0.00086 |
| TAG54:4(16:2) | 0.00020 | 0.00071 | 0.00077 | 0.00030 | 0.00007 | 0.00041 | 0.00070 | 0.00066 | 0.00015 | 0.00049 | 0.00048 | 0.00058 |
| TAG54:3(16:0) | 0.00184 | 0.00189 | 0.00145 | 0.00157 | 0.00162 | 0.00199 | 0.00514 | 0.00637 | 0.00355 | 0.00531 | 0.00435 | 0.00634 |
| TAG54:3(16:1) | 0.00054 | 0.00024 | 0.00031 | 0.00022 | 0.00088 | 0.00166 | 0.00055 | 0.00037 | 0.00023 | 0.00091 | 0.00062 | 0.00094 |
| TAG54:3(18:1) | 0.11325 | 0.13368 | 0.14273 | 0.12758 | 0.12708 | 0.14812 | 0.22616 | 0.19726 | 0.20717 | 0.20994 | 0.18138 | 0.20871 |
| TAG54:3(18:2) | 0.01013 | 0.01312 | 0.01515 | 0.01120 | 0.01392 | 0.01377 | 0.05697 | 0.04481 | 0.04047 | 0.04396 | 0.05028 | 0.04861 |
| TAG54:2(18:2) | 0.00211 | 0.00393 | 0.00360 | 0.00299 | 0.00332 | 0.00307 | 0.01644 | 0.01772 | 0.01513 | 0.01817 | 0.01817 | 0.01837 |
| TAG54:2(18:1) | 0.04371 | 0.05156 | 0.05319 | 0.05181 | 0.04855 | 0.05490 | 0.09141 | 0.09841 | 0.10362 | 0.10245 | 0.09449 | 0.10140 |
| TAG54:2(18:0) | 0.01088 | 0.01548 | 0.01531 | 0.01389 | 0.01216 | 0.01841 | 0.06788 | 0.06451 | 0.06429 | 0.06513 | 0.07163 | 0.07130 |
| TAG54:1(18:0) | 0.00755 | 0.00865 | 0.01048 | 0.00747 | 0.00832 | 0.00846 | 0.03577 | 0.03266 | 0.03146 | 0.03201 | 0.03129 | 0.03399 |

|               |         |         |         |         |         |         |         |         |         |         |         |         |
|---------------|---------|---------|---------|---------|---------|---------|---------|---------|---------|---------|---------|---------|
| TAG54:1(18:1) | 0.00931 | 0.00904 | 0.01064 | 0.00844 | 0.00958 | 0.01111 | 0.02556 | 0.02541 | 0.02360 | 0.02621 | 0.02348 | 0.02564 |
| TAG56:8(22:6) | 0.00102 | 0.00244 | 0.00099 | 0.00216 | 0.00103 | 0.00274 | 0.00413 | 0.00322 | 0.00318 | 0.00384 | 0.00387 | 0.00202 |
| TAG56:8(22:5) | 0.00095 | 0.00008 | 0.00084 | 0.00105 | 0.00059 | 0.00033 | 0.00047 | 0.00073 | 0.00076 | 0.00070 | 0.00083 | 0.00101 |
| TAG56:8(18:1) | 0.00843 | 0.01053 | 0.01071 | 0.00948 | 0.01083 | 0.01045 | 0.01068 | 0.01018 | 0.01021 | 0.01244 | 0.01112 | 0.01095 |
| TAG56:8(18:2) | 0.00163 | 0.00118 | 0.00184 | 0.00090 | 0.00059 | 0.00182 | 0.00288 | 0.00205 | 0.00212 | 0.00266 | 0.00269 | 0.00266 |
| TAG56:7(22:6) | 0.00265 | 0.00346 | 0.00184 | 0.00157 | 0.00265 | 0.00307 | 0.00592 | 0.00527 | 0.00590 | 0.00538 | 0.00449 | 0.00699 |
| TAG56:7(22:5) | 0.00163 | 0.00047 | 0.00046 | 0.00127 | 0.00125 | 0.00182 | 0.00101 | 0.00095 | 0.00113 | 0.00203 | 0.00117 | 0.00230 |
| TAG56:7(20:2) | 0.00020 | 0.00047 | 0.00077 | 0.00045 | 0.00059 | 0.00066 | 0.00000 | 0.00029 | 0.00053 | 0.00063 | 0.00055 | 0.00029 |
| TAG56:7(20:4) | 0.00143 | 0.00189 | 0.00145 | 0.00090 | 0.00140 | 0.00149 | 0.00382 | 0.00359 | 0.00408 | 0.00287 | 0.00380 | 0.00411 |
| TAG56:7(20:5) | 0.00088 | 0.00047 | 0.00084 | 0.00082 | 0.00118 | 0.00066 | 0.00070 | 0.00146 | 0.00113 | 0.00182 | 0.00041 | 0.00166 |
| TAG56:7(18:2) | 0.00102 | 0.00157 | 0.00145 | 0.00097 | 0.00133 | 0.00124 | 0.00242 | 0.00381 | 0.00303 | 0.00189 | 0.00200 | 0.00216 |
| TAG56:7(18:3) | 0.00027 | 0.00118 | 0.00122 | 0.00127 | 0.00111 | 0.00191 | 0.00062 | 0.00110 | 0.00076 | 0.00147 | 0.00048 | 0.00108 |
| TAG56:6(22:5) | 0.00122 | 0.00181 | 0.00207 | 0.00067 | 0.00133 | 0.00249 | 0.00234 | 0.00256 | 0.00166 | 0.00231 | 0.00249 | 0.00166 |
| TAG56:6(22:4) | 0.00143 | 0.00157 | 0.00138 | 0.00119 | 0.00081 | 0.00216 | 0.00070 | 0.00161 | 0.00144 | 0.00196 | 0.00138 | 0.00122 |
| TAG56:6(20:1) | 0.00061 | 0.00063 | 0.00069 | 0.00075 | 0.00044 | 0.00075 | 0.00117 | 0.00059 | 0.00045 | 0.00049 | 0.00035 | 0.00065 |
| TAG56:6(20:2) | 0.00027 | 0.00079 | 0.00084 | 0.00067 | 0.00015 | 0.00008 | 0.00101 | 0.00088 | 0.00045 | 0.00112 | 0.00104 | 0.00050 |
| TAG56:6(20:3) | 0.00075 | 0.00204 | 0.00168 | 0.00134 | 0.00111 | 0.00124 | 0.00156 | 0.00227 | 0.00310 | 0.00328 | 0.00290 | 0.00288 |
| TAG56:6(20:4) | 0.00265 | 0.00212 | 0.00153 | 0.00209 | 0.00155 | 0.00224 | 0.00686 | 0.00864 | 0.00529 | 0.00650 | 0.00739 | 0.00583 |
| TAG56:6(18:2) | 0.00122 | 0.00086 | 0.00230 | 0.00112 | 0.00133 | 0.00232 | 0.00397 | 0.00308 | 0.00280 | 0.00363 | 0.00311 | 0.00411 |
| TAG56:6(18:3) | 0.00082 | 0.00173 | 0.00092 | 0.00142 | 0.00044 | 0.00083 | 0.00226 | 0.00168 | 0.00121 | 0.00175 | 0.00152 | 0.00122 |
| TAG56:5(22:4) | 0.00136 | 0.00118 | 0.00099 | 0.00119 | 0.00103 | 0.00116 | 0.00164 | 0.00249 | 0.00272 | 0.00301 | 0.00180 | 0.00245 |
| TAG56:5(22:1) | 0.00075 | 0.00086 | 0.00031 | 0.00052 | 0.00029 | 0.00075 | 0.00094 | 0.00051 | 0.00091 | 0.00105 | 0.00048 | 0.00094 |
| TAG56:5(20:0) | 0.00054 | 0.00055 | 0.00031 | 0.00060 | 0.00015 | 0.00033 | 0.00039 | 0.00081 | 0.00015 | 0.00049 | 0.00028 | 0.00043 |
| TAG56:5(20:1) | 0.00109 | 0.00118 | 0.00115 | 0.00097 | 0.00125 | 0.00100 | 0.00226 | 0.00293 | 0.00204 | 0.00161 | 0.00228 | 0.00209 |

|               |         |         |         |         |         |         |         |         |         |         |         |         |
|---------------|---------|---------|---------|---------|---------|---------|---------|---------|---------|---------|---------|---------|
| TAG56:5(20:2) | 0.00068 | 0.00086 | 0.00054 | 0.00149 | 0.00118 | 0.00066 | 0.00226 | 0.00183 | 0.00204 | 0.00259 | 0.00180 | 0.00252 |
| TAG56:5(20:3) | 0.00109 | 0.00118 | 0.00115 | 0.00149 | 0.00155 | 0.00091 | 0.00320 | 0.00381 | 0.00272 | 0.00231 | 0.00325 | 0.00317 |
| TAG56:5(18:1) | 0.00252 | 0.00228 | 0.00344 | 0.00246 | 0.00287 | 0.00290 | 0.00701 | 0.00688 | 0.00620 | 0.00664 | 0.00801 | 0.00655 |
| TAG56:5(18:2) | 0.00163 | 0.00157 | 0.00191 | 0.00112 | 0.00243 | 0.00232 | 0.00452 | 0.00329 | 0.00416 | 0.00398 | 0.00421 | 0.00432 |
| TAG56:5(18:3) | 0.00068 | 0.00126 | 0.00130 | 0.00082 | 0.00066 | 0.00116 | 0.00156 | 0.00066 | 0.00121 | 0.00098 | 0.00152 | 0.00086 |
| TAG56:4(20:1) | 0.00156 | 0.00220 | 0.00283 | 0.00231 | 0.00133 | 0.00166 | 0.00436 | 0.00388 | 0.00340 | 0.00489 | 0.00380 | 0.00288 |
| TAG56:4(20:2) | 0.00136 | 0.00094 | 0.00153 | 0.00119 | 0.00125 | 0.00091 | 0.00397 | 0.00417 | 0.00197 | 0.00328 | 0.00325 | 0.00216 |
| TAG56:4(18:1) | 0.00347 | 0.00503 | 0.00375 | 0.00463 | 0.00354 | 0.00423 | 0.00810 | 0.00820 | 0.00824 | 0.01181 | 0.00863 | 0.00742 |
| TAG56:4(18:2) | 0.00122 | 0.00189 | 0.00306 | 0.00269 | 0.00199 | 0.00207 | 0.00577 | 0.00505 | 0.00620 | 0.00650 | 0.00608 | 0.00569 |
| TAG56:3(22:0) | 0.00082 | 0.00118 | 0.00176 | 0.00037 | 0.00118 | 0.00017 | 0.00094 | 0.00103 | 0.00106 | 0.00133 | 0.00111 | 0.00187 |
| TAG56:3(22:1) | 0.00150 | 0.00165 | 0.00061 | 0.00127 | 0.00074 | 0.00166 | 0.00148 | 0.00168 | 0.00098 | 0.00182 | 0.00124 | 0.00173 |
| TAG56:3(20:0) | 0.00088 | 0.00228 | 0.00107 | 0.00082 | 0.00140 | 0.00216 | 0.00444 | 0.00381 | 0.00348 | 0.00447 | 0.00456 | 0.00310 |
| TAG56:3(20:1) | 0.00258 | 0.00275 | 0.00253 | 0.00216 | 0.00346 | 0.00340 | 0.00577 | 0.00564 | 0.00688 | 0.00468 | 0.00670 | 0.00562 |
| TAG56:3(18:1) | 0.00700 | 0.00778 | 0.00582 | 0.00672 | 0.00553 | 0.00680 | 0.01216 | 0.01303 | 0.01361 | 0.01300 | 0.01416 | 0.01102 |
| TAG56:3(18:2) | 0.00136 | 0.00196 | 0.00145 | 0.00202 | 0.00169 | 0.00174 | 0.00600 | 0.00615 | 0.00431 | 0.00503 | 0.00546 | 0.00504 |
| TAG56:2(22:1) | 0.00041 | 0.00047 | 0.00069 | 0.00052 | 0.00037 | 0.00075 | 0.00148 | 0.00095 | 0.00098 | 0.00161 | 0.00076 | 0.00151 |
| TAG56:2(20:1) | 0.00109 | 0.00181 | 0.00107 | 0.00090 | 0.00147 | 0.00141 | 0.00335 | 0.00308 | 0.00363 | 0.00335 | 0.00449 | 0.00202 |
| TAG56:2(18:1) | 0.00721 | 0.00597 | 0.00620 | 0.00784 | 0.00619 | 0.01037 | 0.00990 | 0.01501 | 0.01187 | 0.01104 | 0.01084 | 0.01239 |
| TAG58:9(22:6) | 0.00122 | 0.00157 | 0.00099 | 0.00097 | 0.00155 | 0.00075 | 0.00405 | 0.00264 | 0.00454 | 0.00356 | 0.00338 | 0.00324 |
| TAG58:9(22:5) | 0.00054 | 0.00110 | 0.00084 | 0.00060 | 0.00059 | 0.00050 | 0.00125 | 0.00051 | 0.00061 | 0.00126 | 0.00097 | 0.00086 |
| TAG58:8(22:6) | 0.00136 | 0.00071 | 0.00092 | 0.00172 | 0.00169 | 0.00158 | 0.00514 | 0.00454 | 0.00431 | 0.00426 | 0.00449 | 0.00583 |
| TAG58:8(22:5) | 0.00353 | 0.00479 | 0.00444 | 0.00284 | 0.00508 | 0.00473 | 0.00538 | 0.00469 | 0.00492 | 0.00468 | 0.00394 | 0.00511 |
| TAG58:8(20:4) | 0.00150 | 0.00031 | 0.00161 | 0.00097 | 0.00125 | 0.00058 | 0.00249 | 0.00146 | 0.00151 | 0.00112 | 0.00069 | 0.00122 |
| TAG58:7(20:4) | 0.00136 | 0.00039 | 0.00061 | 0.00045 | 0.00015 | 0.00141 | 0.00125 | 0.00124 | 0.00136 | 0.00049 | 0.00097 | 0.00065 |

|               |         |         |         |         |         |         |         |         |         |         |         |         |
|---------------|---------|---------|---------|---------|---------|---------|---------|---------|---------|---------|---------|---------|
| TAG58:7(22:6) | 0.00150 | 0.00118 | 0.00184 | 0.00097 | 0.00162 | 0.00133 | 0.00491 | 0.00439 | 0.00469 | 0.00552 | 0.00442 | 0.00367 |
| CE-14:0       | 0.00642 | 0.00796 | 0.00508 | 0.00585 | 0.00401 | 0.00427 | 0.02645 | 0.03371 | 0.03273 | 0.02708 | 0.03448 | 0.02537 |
| CE-15:0       | 0.01766 | 0.01737 | 0.01547 | 0.01730 | 0.02079 | 0.01785 | 0.04115 | 0.04074 | 0.02894 | 0.03668 | 0.03668 | 0.03285 |
| CE-16:2       | 0.00252 | 0.00314 | 0.00254 | 0.00468 | 0.00351 | 0.00754 | 0.00686 | 0.01309 | 0.00783 | 0.00714 | 0.00929 | 0.00773 |
| CE-16:1       | 0.00711 | 0.00748 | 0.00947 | 0.01076 | 0.00902 | 0.00805 | 0.06392 | 0.06596 | 0.06712 | 0.06744 | 0.06383 | 0.06402 |
| CE-16:0       | 0.03280 | 0.03040 | 0.02771 | 0.03601 | 0.03056 | 0.03394 | 0.44648 | 0.46025 | 0.44778 | 0.44183 | 0.46074 | 0.43459 |
| CE-17:1       | 0.00115 | 0.00241 | 0.00185 | 0.00327 | 0.00200 | 0.00251 | 0.02082 | 0.01940 | 0.02158 | 0.01846 | 0.01785 | 0.01474 |
| CE-17:0       | 0.00252 | 0.00241 | 0.00346 | 0.00257 | 0.00175 | 0.00427 | 0.05021 | 0.04995 | 0.05076 | 0.04824 | 0.05600 | 0.05363 |
| CE-18:3       | 0.00413 | 0.00410 | 0.00485 | 0.00327 | 0.00326 | 0.00402 | 0.04310 | 0.05480 | 0.04293 | 0.04160 | 0.04622 | 0.04155 |
| CE-18:2       | 0.02546 | 0.03668 | 0.03094 | 0.02596 | 0.02956 | 0.02137 | 0.69947 | 0.83222 | 0.73192 | 0.85634 | 0.83882 | 0.84648 |
| CE-18:1       | 0.12479 | 0.12017 | 0.12609 | 0.12978 | 0.13903 | 0.12496 | 1.50842 | 1.61401 | 1.44936 | 1.66640 | 1.83293 | 1.53835 |
| CE-18:0       | 0.01239 | 0.01689 | 0.02425 | 0.01567 | 0.01979 | 0.02238 | 0.31447 | 0.30748 | 0.32872 | 0.35716 | 0.34996 | 0.35149 |
| CE-20:5       | 0.00275 | 0.00507 | 0.00346 | 0.00538 | 0.00476 | 0.00729 | 0.02449 | 0.02813 | 0.02609 | 0.02141 | 0.03032 | 0.02633 |
| CE-20:4       | 0.04175 | 0.03981 | 0.03094 | 0.03671 | 0.02931 | 0.04148 | 0.24785 | 0.27814 | 0.22271 | 0.25279 | 0.25458 | 0.21355 |
| CE-20:3       | 0.00573 | 0.00893 | 0.00531 | 0.00631 | 0.00701 | 0.00528 | 0.14597 | 0.14840 | 0.13400 | 0.14990 | 0.15700 | 0.17418 |
| CE-20:2       | 0.00344 | 0.00410 | 0.00531 | 0.00491 | 0.00501 | 0.00603 | 0.11633 | 0.09093 | 0.09700 | 0.09698 | 0.10809 | 0.10364 |
| CE-20:1       | 0.00413 | 0.00458 | 0.00670 | 0.00398 | 0.00451 | 0.00754 | 0.07054 | 0.07832 | 0.07803 | 0.08640 | 0.09953 | 0.07924 |
| CE-20:0       | 0.02065 | 0.03402 | 0.02194 | 0.03321 | 0.03207 | 0.03671 | 0.05731 | 0.06790 | 0.05645 | 0.05612 | 0.05454 | 0.05798 |
| CE-22:6       | 0.01262 | 0.01810 | 0.01270 | 0.01567 | 0.02430 | 0.01810 | 0.11805 | 0.12803 | 0.12357 | 0.11766 | 0.14111 | 0.13577 |
| CE-22:5       | 0.01032 | 0.01979 | 0.01432 | 0.01894 | 0.01378 | 0.01861 | 0.06196 | 0.07153 | 0.05882 | 0.06646 | 0.07972 | 0.07223 |
| CE-22:4       | 0.00849 | 0.01038 | 0.01132 | 0.01146 | 0.01353 | 0.01232 | 0.09380 | 0.09651 | 0.09392 | 0.10510 | 0.10663 | 0.11161 |
| CE-22:3       | 0.00665 | 0.01062 | 0.00924 | 0.00935 | 0.00902 | 0.00880 | 0.02057 | 0.02425 | 0.02111 | 0.02117 | 0.02421 | 0.02271 |
| CE-22:2       | 0.00528 | 0.00458 | 0.00346 | 0.00468 | 0.00576 | 0.00603 | 0.02817 | 0.02376 | 0.02372 | 0.01920 | 0.01834 | 0.02029 |
| CE-22:1       | 0.00390 | 0.00338 | 0.00531 | 0.00234 | 0.00451 | 0.00327 | 0.02743 | 0.02861 | 0.03392 | 0.02757 | 0.02617 | 0.03044 |

|         |         |         |         |         |         |         |         |         |         |         |         |         |
|---------|---------|---------|---------|---------|---------|---------|---------|---------|---------|---------|---------|---------|
| CE-22:0 | 0.00390 | 0.00386 | 0.00346 | 0.00210 | 0.00376 | 0.00352 | 0.01396 | 0.01358 | 0.01044 | 0.01698 | 0.02005 | 0.01377 |
| LPE16:1 | 0.00135 | 0.00169 | 0.00177 | 0.00176 | 0.00141 | 0.00174 | 0.00080 | 0.00070 | 0.00063 | 0.00104 | 0.00075 | 0.00068 |
| LPE16:0 | 0.02528 | 0.02579 | 0.02562 | 0.02594 | 0.02737 | 0.02622 | 0.01673 | 0.01821 | 0.01879 | 0.01794 | 0.01734 | 0.01957 |
| LPE18:2 | 0.00986 | 0.01232 | 0.01114 | 0.01178 | 0.01047 | 0.01200 | 0.01842 | 0.01861 | 0.01712 | 0.01773 | 0.01598 | 0.01873 |
| LPE18:1 | 0.01726 | 0.01932 | 0.02130 | 0.02223 | 0.02259 | 0.02208 | 0.02153 | 0.02634 | 0.02342 | 0.02381 | 0.02092 | 0.02418 |
| LPE18:0 | 0.04371 | 0.04996 | 0.04998 | 0.05146 | 0.05238 | 0.05393 | 0.03705 | 0.04269 | 0.03953 | 0.04181 | 0.03650 | 0.04351 |
| PE32:2  | 0.00082 | 0.00463 | 0.00106 | 0.00168 | 0.00069 | 0.00086 | 0.00068 | 0.00115 | 0.00156 | 0.00034 | 0.00179 | 0.00060 |
| PE32:1  | 0.00711 | 0.00772 | 0.00634 | 0.00842 | 0.00555 | 0.00402 | 0.00159 | 0.00115 | 0.00311 | 0.00169 | 0.00036 | 0.00090 |
| PE32:0  | 0.01231 | 0.01120 | 0.00599 | 0.01449 | 0.01007 | 0.01293 | 0.00205 | 0.00143 | 0.00311 | 0.00305 | 0.00214 | 0.00151 |
| PE34:2  | 0.06704 | 0.07105 | 0.07401 | 0.06403 | 0.06388 | 0.06034 | 0.04820 | 0.05016 | 0.06790 | 0.05484 | 0.04932 | 0.06417 |
| PE34:1  | 0.03776 | 0.05947 | 0.04616 | 0.04819 | 0.04652 | 0.04166 | 0.02023 | 0.02407 | 0.03270 | 0.02538 | 0.02359 | 0.02500 |
| PE34:0  | 0.00465 | 0.00849 | 0.00775 | 0.00809 | 0.00486 | 0.00402 | 0.00386 | 0.00458 | 0.00529 | 0.00135 | 0.00607 | 0.00151 |
| PE36:4  | 0.27252 | 0.41612 | 0.41543 | 0.34954 | 0.34450 | 0.31154 | 0.10550 | 0.14881 | 0.13116 | 0.15137 | 0.14302 | 0.14887 |
| PE36:3  | 0.06512 | 0.07761 | 0.07401 | 0.07482 | 0.06666 | 0.05717 | 0.04387 | 0.04757 | 0.04983 | 0.05077 | 0.03753 | 0.03765 |
| PE36:2  | 0.09387 | 0.11162 | 0.07894 | 0.10686 | 0.11217 | 0.08017 | 0.08095 | 0.07998 | 0.10093 | 0.10428 | 0.08616 | 0.10938 |
| PE36:1  | 0.02763 | 0.04131 | 0.02784 | 0.02662 | 0.02951 | 0.02700 | 0.02682 | 0.02636 | 0.04485 | 0.03182 | 0.03717 | 0.02952 |
| PE38:7  | 0.00465 | 0.00309 | 0.00352 | 0.00337 | 0.00139 | 0.00144 | 0.00205 | 0.00143 | 0.00187 | 0.00237 | 0.00465 | 0.00241 |
| PE38:6  | 0.08757 | 0.13286 | 0.13043 | 0.11124 | 0.10869 | 0.09915 | 0.03796 | 0.03897 | 0.05887 | 0.03926 | 0.04468 | 0.03313 |
| PE38:5  | 0.25171 | 0.36337 | 0.31042 | 0.29888 | 0.30024 | 0.23957 | 0.10507 | 0.12616 | 0.14487 | 0.12764 | 0.13694 | 0.13591 |
| PE38:4  | 0.98481 | 1.20741 | 1.18443 | 1.05398 | 1.07631 | 0.93121 | 0.38606 | 0.57084 | 0.58028 | 0.51148 | 0.58947 | 0.53605 |
| PE38:3  | 0.09907 | 0.14368 | 0.13325 | 0.10112 | 0.10695 | 0.09571 | 0.04387 | 0.06707 | 0.06230 | 0.06364 | 0.07399 | 0.05874 |
| PE40:6  | 0.02161 | 0.03205 | 0.02044 | 0.02156 | 0.02152 | 0.02528 | 0.01454 | 0.02092 | 0.02024 | 0.01895 | 0.02430 | 0.02319 |
| PE40:5  | 0.01094 | 0.01737 | 0.01409 | 0.01280 | 0.01388 | 0.01379 | 0.00727 | 0.01146 | 0.00903 | 0.00948 | 0.01286 | 0.00903 |
| PE40:4  | 0.01258 | 0.01853 | 0.01233 | 0.01617 | 0.01770 | 0.01235 | 0.00773 | 0.01490 | 0.01370 | 0.01015 | 0.01680 | 0.01024 |



|         |         |         |         |         |         |         |         |         |         |         |         |         |
|---------|---------|---------|---------|---------|---------|---------|---------|---------|---------|---------|---------|---------|
| PE34:2p | 0.00356 | 0.00309 | 0.00846 | 0.00337 | 0.00521 | 0.00488 | 0.00205 | 0.00172 | 0.00280 | 0.00338 | 0.00429 | 0.00211 |
| PE34:1p | 0.00656 | 0.00618 | 0.00493 | 0.00606 | 0.00798 | 0.00402 | 0.00454 | 0.00401 | 0.00467 | 0.00474 | 0.00286 | 0.00422 |
| PE36:4p | 0.07964 | 0.08650 | 0.07543 | 0.06977 | 0.07222 | 0.07443 | 0.02659 | 0.02980 | 0.03706 | 0.03114 | 0.03503 | 0.03374 |
| PE36:3p | 0.00492 | 0.00733 | 0.00881 | 0.00977 | 0.01007 | 0.01178 | 0.00545 | 0.00487 | 0.00685 | 0.00474 | 0.00500 | 0.00392 |
| PE36:2p | 0.00082 | 0.00502 | 0.00458 | 0.00168 | 0.00278 | 0.00345 | 0.00205 | 0.00287 | 0.00405 | 0.00372 | 0.00429 | 0.00271 |
| PE36:1p | 0.00410 | 0.00386 | 0.00211 | 0.00303 | 0.00278 | 0.00402 | 0.00386 | 0.00401 | 0.00529 | 0.00575 | 0.00572 | 0.00632 |
| PE38:6p | 0.01778 | 0.01930 | 0.01586 | 0.01348 | 0.01527 | 0.01637 | 0.00682 | 0.01146 | 0.01681 | 0.01151 | 0.01322 | 0.00964 |
| PE38:5p | 0.02845 | 0.03784 | 0.03735 | 0.02830 | 0.03818 | 0.03447 | 0.01750 | 0.02206 | 0.02429 | 0.03216 | 0.02645 | 0.03042 |
| PE38:4p | 0.03173 | 0.05212 | 0.04828 | 0.04414 | 0.04964 | 0.03591 | 0.02727 | 0.05015 | 0.05263 | 0.05720 | 0.06184 | 0.04669 |
| PE40:6p | 0.00547 | 0.00965 | 0.00423 | 0.00741 | 0.00764 | 0.00431 | 0.00727 | 0.00917 | 0.00685 | 0.01015 | 0.00786 | 0.00903 |
| PE40:5p | 0.00492 | 0.00618 | 0.00458 | 0.00775 | 0.00659 | 0.00230 | 0.00250 | 0.00630 | 0.00623 | 0.00237 | 0.00393 | 0.00542 |
| PE40:4p | 0.00520 | 0.00347 | 0.00493 | 0.00371 | 0.00382 | 0.00345 | 0.00250 | 0.00516 | 0.00623 | 0.00440 | 0.00536 | 0.00542 |
| PE42:3p | 0.00164 | 0.00154 | 0.00070 | 0.00034 | 0.00035 | 0.00172 | 0.00068 | 0.00172 | 0.00218 | 0.00102 | 0.00322 | 0.00090 |
| PE42:2p | 0.00219 | 0.00386 | 0.00070 | 0.00270 | 0.00243 | 0.00201 | 0.00068 | 0.00029 | 0.00093 | 0.00102 | 0.00143 | 0.00030 |
| PE42:1p | 0.00137 | 0.00232 | 0.00317 | 0.00168 | 0.00208 | 0.00144 | 0.00068 | 0.00057 | 0.00062 | 0.00102 | 0.00107 | 0.00060 |
| PE42:0p | 0.00055 | 0.00193 | 0.00141 | 0.00135 | 0.00139 | 0.00057 | 0.00045 | 0.00057 | 0.00000 | 0.00068 | 0.00000 | 0.00030 |
| LPA16:2 | 0.00000 | 0.00000 | 0.00001 | 0.00000 | 0.00001 | 0.00000 | 0.00000 | 0.00001 | 0.00001 | 0.00001 | 0.00000 | 0.00000 |
| LPA16:1 | 0.00002 | 0.00002 | 0.00002 | 0.00002 | 0.00001 | 0.00001 | 0.00002 | 0.00001 | 0.00001 | 0.00002 | 0.00001 | 0.00002 |
| LPA16:0 | 0.00027 | 0.00036 | 0.00035 | 0.00034 | 0.00035 | 0.00036 | 0.00021 | 0.00029 | 0.00024 | 0.00031 | 0.00024 | 0.00022 |
| LPA18:3 | 0.00003 | 0.00005 | 0.00005 | 0.00005 | 0.00005 | 0.00003 | 0.00004 | 0.00003 | 0.00004 | 0.00003 | 0.00005 | 0.00003 |
| LPA18:2 | 0.00017 | 0.00021 | 0.00021 | 0.00019 | 0.00026 | 0.00024 | 0.00020 | 0.00022 | 0.00019 | 0.00022 | 0.00024 | 0.00021 |
| LPA18:1 | 0.00013 | 0.00016 | 0.00014 | 0.00017 | 0.00016 | 0.00015 | 0.00018 | 0.00019 | 0.00019 | 0.00020 | 0.00021 | 0.00021 |
| LPA18:0 | 0.00023 | 0.00031 | 0.00031 | 0.00032 | 0.00038 | 0.00036 | 0.00031 | 0.00034 | 0.00031 | 0.00034 | 0.00038 | 0.00038 |
| PA32:2  | 0.00005 | 0.00008 | 0.00009 | 0.00007 | 0.00006 | 0.00006 | 0.00005 | 0.00008 | 0.00003 | 0.00008 | 0.00009 | 0.00006 |

|         |         |         |         |         |         |         |         |         |         |         |         |         |
|---------|---------|---------|---------|---------|---------|---------|---------|---------|---------|---------|---------|---------|
| PA32:1  | 0.00015 | 0.00014 | 0.00019 | 0.00016 | 0.00015 | 0.00014 | 0.00007 | 0.00009 | 0.00006 | 0.00008 | 0.00011 | 0.00007 |
| PA32:0  | 0.00129 | 0.00150 | 0.00161 | 0.00156 | 0.00144 | 0.00157 | 0.00058 | 0.00056 | 0.00050 | 0.00049 | 0.00062 | 0.00064 |
| PA34:2  | 0.00098 | 0.00134 | 0.00136 | 0.00128 | 0.00131 | 0.00136 | 0.00087 | 0.00083 | 0.00085 | 0.00072 | 0.00084 | 0.00081 |
| PA34:1  | 0.00069 | 0.00085 | 0.00091 | 0.00079 | 0.00094 | 0.00075 | 0.00071 | 0.00073 | 0.00066 | 0.00063 | 0.00077 | 0.00071 |
| PA36:2  | 0.00079 | 0.00092 | 0.00116 | 0.00102 | 0.00106 | 0.00104 | 0.00115 | 0.00120 | 0.00115 | 0.00133 | 0.00113 | 0.00119 |
| PA36:1  | 0.00053 | 0.00064 | 0.00075 | 0.00049 | 0.00068 | 0.00070 | 0.00084 | 0.00095 | 0.00088 | 0.00096 | 0.00085 | 0.00087 |
| PA38:5  | 0.00055 | 0.00067 | 0.00077 | 0.00059 | 0.00076 | 0.00065 | 0.00021 | 0.00032 | 0.00024 | 0.00027 | 0.00038 | 0.00033 |
| PA38:4  | 0.00334 | 0.00407 | 0.00469 | 0.00355 | 0.00421 | 0.00477 | 0.00217 | 0.00228 | 0.00216 | 0.00227 | 0.00184 | 0.00240 |
| PA38:3  | 0.00054 | 0.00059 | 0.00070 | 0.00071 | 0.00073 | 0.00064 | 0.00038 | 0.00044 | 0.00043 | 0.00055 | 0.00034 | 0.00050 |
| PA40:6  | 0.00016 | 0.00018 | 0.00021 | 0.00012 | 0.00017 | 0.00014 | 0.00018 | 0.00022 | 0.00013 | 0.00019 | 0.00021 | 0.00017 |
| PA40:5  | 0.00005 | 0.00011 | 0.00012 | 0.00011 | 0.00009 | 0.00011 | 0.00012 | 0.00010 | 0.00009 | 0.00016 | 0.00011 | 0.00014 |
| LPI16:0 | 0.00485 | 0.00604 | 0.00664 | 0.00584 | 0.00634 | 0.00582 | 0.00498 | 0.00459 | 0.00478 | 0.00443 | 0.00440 | 0.00453 |
| LPI18:0 | 0.01495 | 0.01871 | 0.01742 | 0.01768 | 0.01764 | 0.01791 | 0.01934 | 0.01734 | 0.01857 | 0.01704 | 0.01668 | 0.01833 |
| LPI20:4 | 0.02188 | 0.02859 | 0.02843 | 0.02843 | 0.02756 | 0.02749 | 0.02178 | 0.02233 | 0.02195 | 0.02173 | 0.02092 | 0.02190 |
| PI 34:2 | 0.00491 | 0.00495 | 0.00520 | 0.00637 | 0.00678 | 0.00702 | 0.00550 | 0.00488 | 0.00753 | 0.00659 | 0.00633 | 0.00521 |
| PI 34:1 | 0.00724 | 0.00746 | 0.00796 | 0.00829 | 0.00934 | 0.01001 | 0.00776 | 0.00798 | 0.01163 | 0.00946 | 0.00900 | 0.00784 |
| PI 36:4 | 0.02385 | 0.02394 | 0.02587 | 0.02662 | 0.03095 | 0.03393 | 0.01666 | 0.01682 | 0.01787 | 0.01703 | 0.01773 | 0.01751 |
| PI 36:3 | 0.00694 | 0.00688 | 0.00706 | 0.00744 | 0.00867 | 0.01010 | 0.00708 | 0.00774 | 0.00907 | 0.00785 | 0.00767 | 0.00704 |
| PI 36:2 | 0.00903 | 0.00885 | 0.00989 | 0.01096 | 0.01178 | 0.01198 | 0.02037 | 0.01963 | 0.02460 | 0.01957 | 0.01981 | 0.01884 |
| PI 36:1 | 0.00283 | 0.00305 | 0.00282 | 0.00359 | 0.00359 | 0.00400 | 0.00613 | 0.00613 | 0.00804 | 0.00762 | 0.00753 | 0.00634 |
| PI 38:6 | 0.00516 | 0.00533 | 0.00492 | 0.00545 | 0.00645 | 0.00656 | 0.00348 | 0.00361 | 0.00386 | 0.00370 | 0.00307 | 0.00352 |
| PI 38:5 | 0.01048 | 0.01085 | 0.01007 | 0.01099 | 0.01241 | 0.01347 | 0.01237 | 0.01276 | 0.01475 | 0.01242 | 0.01179 | 0.01416 |
| PI 38:4 | 0.18758 | 0.19550 | 0.20294 | 0.21321 | 0.23663 | 0.24597 | 0.21099 | 0.20259 | 0.23097 | 0.21109 | 0.18921 | 0.21574 |
| PI 38:3 | 0.03594 | 0.03877 | 0.04103 | 0.03995 | 0.04434 | 0.05160 | 0.04652 | 0.04513 | 0.05572 | 0.04701 | 0.04318 | 0.04896 |

|         |         |         |         |         |         |         |         |         |         |         |         |         |
|---------|---------|---------|---------|---------|---------|---------|---------|---------|---------|---------|---------|---------|
| PI 40:6 | 0.00418 | 0.00408 | 0.00453 | 0.00476 | 0.00482 | 0.00578 | 0.00376 | 0.00372 | 0.00368 | 0.00324 | 0.00327 | 0.00378 |
| PI 40:5 | 0.00185 | 0.00188 | 0.00213 | 0.00237 | 0.00272 | 0.00287 | 0.00292 | 0.00283 | 0.00262 | 0.00294 | 0.00251 | 0.00285 |
| PI 40:4 | 0.00232 | 0.00234 | 0.00237 | 0.00240 | 0.00269 | 0.00302 | 0.00361 | 0.00338 | 0.00342 | 0.00332 | 0.00325 | 0.00366 |
| LPS16:1 | 0.00009 | 0.00011 | 0.00010 | 0.00014 | 0.00013 | 0.00008 | 0.00013 | 0.00006 | 0.00008 | 0.00011 | 0.00007 | 0.00007 |
| LPS16:0 | 0.00215 | 0.00292 | 0.00309 | 0.00297 | 0.00274 | 0.00325 | 0.00219 | 0.00218 | 0.00229 | 0.00209 | 0.00228 | 0.00250 |
| LPS18:1 | 0.00594 | 0.00732 | 0.00725 | 0.00769 | 0.00756 | 0.00773 | 0.00859 | 0.00924 | 0.00881 | 0.00947 | 0.00930 | 0.01040 |
| LPS18:0 | 0.01696 | 0.02279 | 0.02242 | 0.02236 | 0.02309 | 0.02284 | 0.01945 | 0.01936 | 0.01817 | 0.01901 | 0.01883 | 0.02064 |
| PS 34:2 | 0.01221 | 0.01446 | 0.01367 | 0.01304 | 0.01134 | 0.01281 | 0.01421 | 0.01538 | 0.01467 | 0.01399 | 0.01521 | 0.01487 |
| PS 34:1 | 0.04087 | 0.05072 | 0.04658 | 0.04830 | 0.04720 | 0.04789 | 0.03130 | 0.03457 | 0.03161 | 0.03163 | 0.03375 | 0.03119 |
| PS 36:2 | 0.11418 | 0.13806 | 0.13023 | 0.12627 | 0.12348 | 0.13089 | 0.20019 | 0.21225 | 0.19783 | 0.19899 | 0.20055 | 0.20768 |
| PS 36:1 | 0.19594 | 0.23728 | 0.21821 | 0.21780 | 0.22044 | 0.22258 | 0.28965 | 0.32585 | 0.30602 | 0.30098 | 0.29865 | 0.30477 |
| PS 38:5 | 0.05480 | 0.06801 | 0.06305 | 0.06362 | 0.06263 | 0.06269 | 0.04431 | 0.04750 | 0.04526 | 0.04299 | 0.04511 | 0.04609 |
| PS 38:4 | 1.62018 | 2.09901 | 1.84354 | 1.91230 | 1.86568 | 1.94055 | 1.02183 | 1.08036 | 1.00618 | 0.98639 | 0.99365 | 1.03781 |
| PS 38:3 | 0.23768 | 0.30704 | 0.27974 | 0.27283 | 0.27454 | 0.28248 | 0.19429 | 0.20537 | 0.18874 | 0.19052 | 0.19792 | 0.20184 |
| PS 40:7 | 0.00298 | 0.00449 | 0.00335 | 0.00359 | 0.00322 | 0.00332 | 0.00331 | 0.00347 | 0.00347 | 0.00316 | 0.00350 | 0.00325 |
| PS 40:6 | 0.04136 | 0.04919 | 0.04333 | 0.04751 | 0.04671 | 0.04751 | 0.05999 | 0.06375 | 0.06191 | 0.05643 | 0.05908 | 0.06490 |
| PS 40:5 | 0.03663 | 0.04804 | 0.04386 | 0.04176 | 0.04408 | 0.04358 | 0.03992 | 0.04458 | 0.04255 | 0.04051 | 0.04134 | 0.04340 |
| PS 40:4 | 0.06810 | 0.08877 | 0.07809 | 0.07963 | 0.07853 | 0.08061 | 0.06413 | 0.06991 | 0.06514 | 0.06448 | 0.06540 | 0.06668 |
| PG32:2  | 0.00079 | 0.00030 | 0.00055 | 0.00070 | 0.00056 | 0.00114 | 0.00022 | 0.00025 | 0.00060 | 0.00073 | 0.00082 | 0.00053 |
| PG32:1  | 0.00297 | 0.00108 | 0.00217 | 0.00235 | 0.00204 | 0.00332 | 0.00095 | 0.00114 | 0.00133 | 0.00066 | 0.00088 | 0.00145 |
| PG34:3  | 0.00079 | 0.00030 | 0.00038 | 0.00076 | 0.00046 | 0.00082 | 0.00017 | 0.00000 | 0.00033 | 0.00060 | 0.00044 | 0.00031 |
| PG34:2  | 0.00535 | 0.00298 | 0.00439 | 0.00413 | 0.00440 | 0.00387 | 0.00512 | 0.00538 | 0.00485 | 0.00445 | 0.00384 | 0.00443 |
| PG34:1  | 0.03824 | 0.02625 | 0.02622 | 0.03405 | 0.03105 | 0.03124 | 0.02656 | 0.02565 | 0.01868 | 0.01549 | 0.02036 | 0.02063 |
| PG36:4  | 0.01008 | 0.01049 | 0.01082 | 0.01183 | 0.01611 | 0.01362 | 0.00868 | 0.01108 | 0.01270 | 0.00698 | 0.01147 | 0.00856 |

|          |         |         |         |         |         |         |         |         |         |         |         |         |
|----------|---------|---------|---------|---------|---------|---------|---------|---------|---------|---------|---------|---------|
| PG36:3   | 0.00514 | 0.00505 | 0.00332 | 0.00515 | 0.00593 | 0.00556 | 0.00417 | 0.00595 | 0.00751 | 0.00472 | 0.00643 | 0.00581 |
| PG36:2   | 0.00501 | 0.00449 | 0.00588 | 0.00750 | 0.00700 | 0.00627 | 0.00968 | 0.01108 | 0.01236 | 0.01070 | 0.01159 | 0.01100 |
| PG36:1   | 0.00259 | 0.00255 | 0.00234 | 0.00242 | 0.00266 | 0.00212 | 0.00462 | 0.00563 | 0.00585 | 0.00326 | 0.00498 | 0.00512 |
| PG38:6   | 0.00134 | 0.00104 | 0.00136 | 0.00159 | 0.00169 | 0.00174 | 0.00184 | 0.00127 | 0.00133 | 0.00066 | 0.00157 | 0.00176 |
| PG38:5   | 0.00247 | 0.00112 | 0.00128 | 0.00273 | 0.00148 | 0.00109 | 0.00189 | 0.00184 | 0.00080 | 0.00106 | 0.00132 | 0.00160 |
| PG38:4   | 0.00330 | 0.00211 | 0.00251 | 0.00413 | 0.00158 | 0.00289 | 0.00228 | 0.00348 | 0.00259 | 0.00193 | 0.00271 | 0.00252 |
| PG38:3   | 0.00088 | 0.00039 | 0.00043 | 0.00114 | 0.00082 | 0.00082 | 0.00133 | 0.00114 | 0.00153 | 0.00146 | 0.00126 | 0.00053 |
| LBPA32:2 | 0.00012 | 0.00046 | 0.00034 | 0.00035 | 0.00021 | 0.00077 | 0.00019 | 0.00018 | 0.00043 | 0.00084 | 0.00027 | 0.00024 |
| LBPA32:1 | 0.00012 | 0.00027 | 0.00110 | 0.00035 | 0.00064 | 0.00098 | 0.00028 | 0.00054 | 0.00052 | 0.00098 | 0.00107 | 0.00048 |
| LBPA34:3 | 0.00030 | 0.00037 | 0.00008 | 0.00059 | 0.00043 | 0.00011 | 0.00084 | 0.00054 | 0.00052 | 0.00042 | 0.00053 | 0.00024 |
| LBPA34:2 | 0.00066 | 0.00091 | 0.00051 | 0.00071 | 0.00064 | 0.00044 | 0.00262 | 0.00073 | 0.00130 | 0.00252 | 0.00267 | 0.00169 |
| LBPA34:1 | 0.00084 | 0.00027 | 0.00042 | 0.00059 | 0.00053 | 0.00098 | 0.00150 | 0.00190 | 0.00199 | 0.00210 | 0.00232 | 0.00229 |
| LBPA36:4 | 0.00376 | 0.00502 | 0.00262 | 0.00354 | 0.00491 | 0.00459 | 0.01067 | 0.00853 | 0.00865 | 0.01049 | 0.00820 | 0.00834 |
| LBPA36:3 | 0.00269 | 0.00356 | 0.00432 | 0.00295 | 0.00352 | 0.00601 | 0.01441 | 0.01842 | 0.01342 | 0.01623 | 0.01498 | 0.01136 |
| LBPA36:2 | 0.00090 | 0.00155 | 0.00178 | 0.00130 | 0.00149 | 0.00273 | 0.01151 | 0.01125 | 0.01030 | 0.01343 | 0.01186 | 0.01293 |
| LBPA36:1 | 0.00066 | 0.00027 | 0.00017 | 0.00059 | 0.00075 | 0.00098 | 0.00299 | 0.00154 | 0.00260 | 0.00266 | 0.00330 | 0.00217 |
| LBPA38:6 | 0.00358 | 0.00265 | 0.00440 | 0.00543 | 0.00534 | 0.00689 | 0.00692 | 0.00907 | 0.00727 | 0.01343 | 0.00758 | 0.01027 |
| LBPA38:5 | 0.00173 | 0.00310 | 0.00279 | 0.00343 | 0.00309 | 0.00481 | 0.00833 | 0.00989 | 0.00917 | 0.01287 | 0.01026 | 0.00797 |
| LBPA38:4 | 0.00084 | 0.00100 | 0.00144 | 0.00154 | 0.00203 | 0.00077 | 0.00355 | 0.00317 | 0.00329 | 0.00574 | 0.00446 | 0.00362 |
| LBPA38:3 | 0.00048 | 0.00064 | 0.00017 | 0.00024 | 0.00139 | 0.00033 | 0.00131 | 0.00190 | 0.00173 | 0.00224 | 0.00178 | 0.00181 |
| FFA22:6  | 0.78229 | 1.02476 | 1.01825 | 1.09404 | 1.33466 | 1.08219 | 2.04725 | 2.13854 | 1.95199 | 1.86409 | 2.04307 | 2.06736 |
| FFA22:5  | 0.17424 | 0.23247 | 0.21136 | 0.25003 | 0.24899 | 0.23345 | 0.37663 | 0.41499 | 0.34619 | 0.39176 | 0.36456 | 0.41594 |
| FFA22:4  | 0.07445 | 0.11778 | 0.10227 | 0.10497 | 0.10952 | 0.10099 | 0.18863 | 0.18343 | 0.17290 | 0.19415 | 0.18625 | 0.19055 |
| FFA20:5  | 0.14591 | 0.14986 | 0.15683 | 0.17216 | 0.16049 | 0.16968 | 0.20269 | 0.19179 | 0.18433 | 0.20382 | 0.19868 | 0.21994 |

|                   |         |         |         |         |         |         |         |         |         |         |         |         |
|-------------------|---------|---------|---------|---------|---------|---------|---------|---------|---------|---------|---------|---------|
| FFA20:4           | 1.45121 | 1.59303 | 1.77063 | 1.74268 | 1.73574 | 1.55763 | 1.75444 | 1.73881 | 1.63602 | 1.70970 | 1.70430 | 1.68875 |
| FFA20:3           | 0.14456 | 0.14977 | 0.13155 | 0.15786 | 0.15064 | 0.13078 | 0.16189 | 0.17343 | 0.15517 | 0.18375 | 0.16152 | 0.15931 |
| FFA18:2           | 1.83331 | 1.82504 | 1.50759 | 1.54086 | 1.51435 | 1.74870 | 3.44845 | 3.61875 | 3.76712 | 2.89835 | 3.31538 | 3.89155 |
| FFA18:1           | 0.74189 | 0.77286 | 0.71104 | 0.56771 | 0.55843 | 0.51434 | 1.09764 | 0.99119 | 1.05353 | 0.75148 | 1.04286 | 1.10340 |
| FFA18:0           | 2.14975 | 2.26951 | 2.09508 | 2.35050 | 2.43066 | 2.25399 | 2.65675 | 2.54576 | 2.50281 | 2.40112 | 2.36948 | 2.60867 |
| FFA16:1           | 0.41705 | 0.39989 | 0.49389 | 0.35646 | 0.41882 | 0.33563 | 0.33202 | 0.34259 | 0.40476 | 0.34523 | 0.40456 | 0.40621 |
| FFA16:0           | 1.98143 | 2.03595 | 2.12937 | 2.05564 | 2.02928 | 1.73521 | 2.14489 | 2.24816 | 2.27284 | 1.92570 | 2.06508 | 2.16535 |
| LysoPC14:0e       | 0.00189 | 0.00229 | 0.00221 | 0.00225 | 0.00246 | 0.00266 | 0.00247 | 0.00222 | 0.00261 | 0.00249 | 0.00218 | 0.00212 |
| LysoPC16:1        | 0.00477 | 0.00615 | 0.00563 | 0.00608 | 0.00637 | 0.00637 | 0.00452 | 0.00421 | 0.00424 | 0.00395 | 0.00409 | 0.00382 |
| LysoPC16:0        | 0.18044 | 0.21353 | 0.20121 | 0.21200 | 0.21320 | 0.22784 | 0.18266 | 0.17414 | 0.17342 | 0.19811 | 0.17097 | 0.15187 |
| LysoPC18:3        | 0.00094 | 0.00119 | 0.00109 | 0.00117 | 0.00113 | 0.00126 | 0.00094 | 0.00100 | 0.00101 | 0.00102 | 0.00093 | 0.00088 |
| LysoPC18:2        | 0.06488 | 0.08234 | 0.07278 | 0.08931 | 0.08264 | 0.09276 | 0.13132 | 0.12252 | 0.12589 | 0.12700 | 0.11074 | 0.11013 |
| LysoPC18:1        | 0.04883 | 0.06036 | 0.05670 | 0.06730 | 0.06815 | 0.06371 | 0.08091 | 0.08043 | 0.08104 | 0.08200 | 0.07400 | 0.08074 |
| LysoPC18:0        | 0.10393 | 0.11896 | 0.11699 | 0.12206 | 0.11529 | 0.12975 | 0.11622 | 0.11605 | 0.11536 | 0.12737 | 0.10786 | 0.10863 |
| LysoPC20:5        | 0.00391 | 0.00575 | 0.00503 | 0.00634 | 0.00572 | 0.00631 | 0.00444 | 0.00393 | 0.00428 | 0.00444 | 0.00390 | 0.00385 |
| LysoPC20:4        | 0.17779 | 0.24737 | 0.23003 | 0.27983 | 0.21977 | 0.26046 | 0.20310 | 0.20343 | 0.21087 | 0.23789 | 0.19817 | 0.18062 |
| LysoPC20:3        | 0.01640 | 0.02264 | 0.02032 | 0.02491 | 0.02015 | 0.02385 | 0.02352 | 0.02219 | 0.02307 | 0.02447 | 0.02089 | 0.02001 |
| LysoPC22:6        | 0.01233 | 0.01787 | 0.01709 | 0.02126 | 0.01614 | 0.01930 | 0.02531 | 0.02262 | 0.02421 | 0.02520 | 0.02262 | 0.02135 |
| LysoPC22:5        | 0.00297 | 0.00409 | 0.00361 | 0.00505 | 0.00401 | 0.00442 | 0.00632 | 0.00560 | 0.00568 | 0.00576 | 0.00529 | 0.00532 |
| GluCer d18:1/16:0 | 0.00151 | 0.00221 | 0.00193 | 0.00199 | 0.00167 | 0.00171 | 0.00602 | 0.00555 | 0.00826 | 0.00708 | 0.00603 | 0.00702 |
| GluCer d18:1/18:0 | 0.00048 | 0.00037 | 0.00080 | 0.00058 | 0.00048 | 0.00049 | 0.00112 | 0.00256 | 0.00296 | 0.00194 | 0.00281 | 0.00300 |
| GluCer d18:1/20:0 | 0.00054 | 0.00087 | 0.00146 | 0.00082 | 0.00051 | 0.00114 | 0.00169 | 0.00184 | 0.00338 | 0.00301 | 0.00367 | 0.00313 |
| GluCer d18:1/22:0 | 0.00098 | 0.00140 | 0.00134 | 0.00136 | 0.00131 | 0.00145 | 0.00697 | 0.00841 | 0.00946 | 0.00704 | 0.00838 | 0.00862 |
| GluCer d18:0/22:0 | 0.00007 | 0.00006 | 0.00006 | 0.00009 | 0.00006 | 0.00001 | 0.00021 | 0.00019 | 0.00039 | 0.00018 | 0.00043 | 0.00027 |

|                   |         |         |         |         |         |         |         |         |         |         |         |         |
|-------------------|---------|---------|---------|---------|---------|---------|---------|---------|---------|---------|---------|---------|
| GluCer d18:1/24:1 | 0.00214 | 0.00296 | 0.00270 | 0.00228 | 0.00199 | 0.00329 | 0.01046 | 0.00989 | 0.01603 | 0.01009 | 0.01513 | 0.01273 |
| GluCer d18:0/24:1 | 0.00379 | 0.00514 | 0.00598 | 0.00471 | 0.00432 | 0.00762 | 0.01701 | 0.01658 | 0.02433 | 0.02180 | 0.02303 | 0.02228 |
| GluCer d18:1/24:0 | 0.00007 | 0.00020 | 0.00011 | 0.00017 | 0.00020 | 0.00017 | 0.00026 | 0.00040 | 0.00019 | 0.00016 | 0.00054 | 0.00037 |
| GluCer d18:0/24:0 | 0.00004 | 0.00020 | 0.00013 | 0.00017 | 0.00013 | 0.00004 | 0.00055 | 0.00042 | 0.00051 | 0.00038 | 0.00014 | 0.00077 |
| GalCer d18:1/22:0 | 0.00591 | 0.00794 | 0.00854 | 0.00900 | 0.01260 | 0.01053 | 0.00855 | 0.00644 | 0.00805 | 0.00694 | 0.00991 | 0.00792 |
| GalCer d18:0/22:0 | 0.00018 | 0.00017 | 0.00019 | 0.00020 | 0.00039 | 0.00029 | 0.00027 | 0.00032 | 0.00014 | 0.00035 | 0.00067 | 0.00032 |
| GalCer d18:1/24:1 | 0.11406 | 0.16765 | 0.17650 | 0.17063 | 0.28965 | 0.20481 | 0.10072 | 0.08321 | 0.08278 | 0.08340 | 0.10153 | 0.08796 |
| GalCer d18:0/24:1 | 0.01000 | 0.01475 | 0.01540 | 0.01527 | 0.02536 | 0.01759 | 0.01309 | 0.00972 | 0.01042 | 0.01246 | 0.01140 | 0.00967 |
| GalCer d18:1/24:0 | 0.00230 | 0.00370 | 0.00364 | 0.00355 | 0.00603 | 0.00362 | 0.00265 | 0.00234 | 0.00198 | 0.00184 | 0.00227 | 0.00210 |
| GalCer d18:0/24:0 | 0.00023 | 0.00049 | 0.00039 | 0.00056 | 0.00074 | 0.00043 | 0.00021 | 0.00030 | 0.00041 | 0.00018 | 0.00022 | 0.00034 |
| Gb3 d18:1/16:0    | 0.00882 | 0.01883 | 0.04257 | 0.02598 | 0.01467 | 0.03260 | 0.01402 | 0.01410 | 0.01608 | 0.01558 | 0.01229 | 0.01289 |
| PC32:2            | 0.01779 | 0.01273 | 0.01978 | 0.01427 | 0.01415 | 0.01005 | 0.01050 | 0.01325 | 0.01119 | 0.01150 | 0.01585 | 0.01037 |
| PC32:1            | 0.12196 | 0.05325 | 0.05614 | 0.14108 | 0.15567 | 0.11513 | 0.05332 | 0.07905 | 0.07830 | 0.06560 | 0.08066 | 0.05494 |
| PC32:0            | 0.80866 | 0.86321 | 0.67350 | 0.93934 | 1.24945 | 0.95503 | 0.26724 | 0.71477 | 0.65272 | 0.63936 | 0.65376 | 0.65009 |
| PC34:3            | 0.05421 | 0.03338 | 0.04581 | 0.05282 | 0.04820 | 0.04321 | 0.03954 | 0.06319 | 0.03081 | 0.03538 | 0.02701 | 0.03290 |
| PC34:2            | 0.72075 | 0.75660 | 0.79130 | 0.49772 | 1.03963 | 0.62100 | 0.84502 | 1.71402 | 0.80716 | 0.31164 | 1.02160 | 0.90147 |
| PC34:1            | 0.67247 | 0.63825 | 0.73298 | 0.76069 | 1.08024 | 0.72894 | 0.70690 | 1.35782 | 1.05424 | 0.64953 | 0.95049 | 1.04459 |
| PC36:5            | 0.09198 | 0.07859 | 0.14544 | 0.14584 | 0.20038 | 0.14140 | 0.06431 | 0.09822 | 0.08282 | 0.05735 | 0.08768 | 0.06289 |
| PC36:4            | 2.67290 | 2.11671 | 3.20632 | 3.39312 | 3.95436 | 1.79191 | 1.67020 | 2.51637 | 1.28621 | 0.97931 | 2.13738 | 1.62450 |
| PC36:3            | 0.86980 | 0.60041 | 0.73328 | 0.88111 | 0.83516 | 0.91268 | 0.64078 | 1.21510 | 0.92237 | 0.88304 | 0.91538 | 0.70390 |
| PC36:2            | 0.89081 | 0.93790 | 0.56631 | 0.94295 | 0.91781 | 0.84493 | 1.42068 | 1.69060 | 1.70166 | 0.87391 | 1.46831 | 1.35108 |
| PC36:1            | 0.24104 | 0.19214 | 0.23793 | 0.31628 | 0.61037 | 0.21489 | 0.47263 | 0.62980 | 0.44097 | 0.36634 | 0.47749 | 0.37213 |
| PC38:6            | 0.83085 | 0.67141 | 0.88438 | 1.04597 | 1.07676 | 0.70081 | 0.77612 | 0.99121 | 0.84975 | 0.55253 | 0.35002 | 0.60827 |
| PC38:5            | 0.69737 | 0.51444 | 0.36663 | 0.77382 | 0.94467 | 0.31997 | 0.61601 | 0.79997 | 0.45039 | 0.33641 | 0.54249 | 0.48526 |

|                |         |         |         |         |         |         |         |         |         |         |         |         |
|----------------|---------|---------|---------|---------|---------|---------|---------|---------|---------|---------|---------|---------|
| PC38:4         | 1.96922 | 2.10522 | 1.54824 | 2.10163 | 1.07594 | 1.01058 | 1.26861 | 1.50763 | 1.21653 | 0.83366 | 1.53673 | 1.11055 |
| PC38:3         | 0.31201 | 0.26448 | 0.25887 | 0.32646 | 0.31995 | 0.24145 | 0.31071 | 0.39430 | 0.40878 | 0.23985 | 0.31653 | 0.26646 |
| PC40:7         | 0.03489 | 0.04131 | 0.06559 | 0.05824 | 0.07712 | 0.05369 | 0.05856 | 0.08213 | 0.05653 | 0.05071 | 0.06716 | 0.05203 |
| PC40:6         | 0.13517 | 0.05046 | 0.15023 | 0.15519 | 0.19812 | 0.14728 | 0.18324 | 0.27573 | 0.13051 | 0.13548 | 0.16438 | 0.14782 |
| PC40:5         | 0.06030 | 0.04242 | 0.06399 | 0.06726 | 0.07486 | 0.06302 | 0.07251 | 0.12142 | 0.06064 | 0.06531 | 0.08283 | 0.05365 |
| PC32:2e        | 0.00695 | 0.00368 | 0.00437 | 0.00591 | 0.00677 | 0.00502 | 0.00755 | 0.01184 | 0.00667 | 0.00826 | 0.00360 | 0.00357 |
| PC32:1e        | 0.05218 | 0.06308 | 0.06210 | 0.05841 | 0.06727 | 0.05513 | 0.03790 | 0.08615 | 0.07301 | 0.05455 | 0.08894 | 0.05478 |
| PC34:2p        | 0.00135 | 0.00123 | 0.00131 | 0.00164 | 0.00103 | 0.00057 | 0.00099 | 0.00284 | 0.00177 | 0.00177 | 0.00072 | 0.00308 |
| PC34:1p        | 0.01456 | 0.00882 | 0.01294 | 0.01591 | 0.02113 | 0.01249 | 0.03232 | 0.03787 | 0.02532 | 0.02211 | 0.02611 | 0.01070 |
| PC34:0p        | 0.03083 | 0.02746 | 0.02313 | 0.02526 | 0.03056 | 0.02369 | 0.07891 | 0.09017 | 0.09420 | 0.06899 | 0.07328 | 0.05430 |
| PC36:4p        | 0.00745 | 0.00357 | 0.00218 | 0.00344 | 0.00574 | 0.00445 | 0.00427 | 0.00521 | 0.00628 | 0.00472 | 0.00504 | 0.00664 |
| PC36:3p        | 0.03066 | 0.02847 | 0.03069 | 0.04036 | 0.04369 | 0.03086 | 0.04905 | 0.05917 | 0.05416 | 0.03199 | 0.05113 | 0.04425 |
| PC36:2p        | 0.00999 | 0.00704 | 0.00815 | 0.00903 | 0.01107 | 0.01034 | 0.01969 | 0.01822 | 0.01766 | 0.02079 | 0.02143 | 0.01507 |
| PC36:1p        | 0.01711 | 0.01284 | 0.01600 | 0.01887 | 0.04041 | 0.01952 | 0.04134 | 0.06864 | 0.04592 | 0.04658 | 0.05707 | 0.04376 |
| PC36:0p        | 0.01321 | 0.00637 | 0.01120 | 0.01345 | 0.01641 | 0.01306 | 0.03035 | 0.04402 | 0.02845 | 0.02727 | 0.03439 | 0.02577 |
| PC38:4p        | 0.04353 | 0.02568 | 0.03097 | 0.05217 | 0.04882 | 0.03546 | 0.08121 | 0.10579 | 0.05691 | 0.09199 | 0.09219 | 0.10211 |
| PC38:3p        | 0.04709 | 0.04779 | 0.04508 | 0.06414 | 0.06727 | 0.07551 | 0.06775 | 0.08757 | 0.07418 | 0.06708 | 0.09290 | 0.09547 |
| PC38:2p        | 0.00897 | 0.01172 | 0.01599 | 0.01476 | 0.01539 | 0.01077 | 0.02182 | 0.02604 | 0.02178 | 0.01798 | 0.02467 | 0.01961 |
| PC40:4p        | 0.00881 | 0.00614 | 0.00756 | 0.01083 | 0.01313 | 0.00933 | 0.01378 | 0.02438 | 0.01413 | 0.01415 | 0.01944 | 0.01702 |
| PC40:3p        | 0.01169 | 0.01273 | 0.01134 | 0.01181 | 0.01457 | 0.01048 | 0.01198 | 0.02604 | 0.01492 | 0.00885 | 0.01837 | 0.01264 |
| PC40:2p        | 0.00271 | 0.00369 | 0.00392 | 0.00328 | 0.00944 | 0.00531 | 0.00230 | 0.00852 | 0.00608 | 0.00811 | 0.00721 | 0.00551 |
| PC40:1p        | 0.00762 | 0.00614 | 0.00800 | 0.01017 | 0.00861 | 0.00660 | 0.00164 | 0.00520 | 0.00334 | 0.00177 | 0.00306 | 0.00453 |
| GM3 d18:1/16:0 | 0.00160 | 0.00184 | 0.00195 | 0.00207 | 0.00179 | 0.00212 | 0.00352 | 0.00489 | 0.00443 | 0.00440 | 0.00433 | 0.00502 |
| GM3 d18:0/16:0 | 0.00031 | 0.00045 | 0.00027 | 0.00044 | 0.00055 | 0.00052 | 0.00094 | 0.00105 | 0.00113 | 0.00109 | 0.00135 | 0.00154 |

|                |          |          |          |          |          |          |          |          |          |          |          |          |
|----------------|----------|----------|----------|----------|----------|----------|----------|----------|----------|----------|----------|----------|
| GM3 d18:1/18:1 | 0.00002  | 0.00004  | 0.00003  | 0.00001  | 0.00004  | 0.00004  | 0.00008  | 0.00023  | 0.00008  | 0.00023  | 0.00004  | 0.00020  |
| GM3 d18:1/18:0 | 0.00083  | 0.00075  | 0.00091  | 0.00076  | 0.00065  | 0.00097  | 0.00170  | 0.00202  | 0.00195  | 0.00160  | 0.00203  | 0.00234  |
| GM3 d18:0/18:0 | 0.00064  | 0.00044  | 0.00050  | 0.00055  | 0.00054  | 0.00064  | 0.00084  | 0.00111  | 0.00082  | 0.00096  | 0.00081  | 0.00104  |
| GM3 d18:1/20:1 | 0.00003  | 0.00006  | 0.00008  | 0.00009  | 0.00015  | 0.00010  | 0.00014  | 0.00020  | 0.00016  | 0.00010  | 0.00015  | 0.00020  |
| GM3 d18:1/20:0 | 0.00083  | 0.00109  | 0.00091  | 0.00121  | 0.00090  | 0.00102  | 0.00180  | 0.00195  | 0.00231  | 0.00190  | 0.00193  | 0.00256  |
| GM3 d18:0/20:0 | 0.00026  | 0.00033  | 0.00030  | 0.00028  | 0.00024  | 0.00027  | 0.00053  | 0.00070  | 0.00080  | 0.00057  | 0.00052  | 0.00054  |
| GM3 d18:1/22:1 | 0.00023  | 0.00031  | 0.00019  | 0.00042  | 0.00036  | 0.00037  | 0.00054  | 0.00085  | 0.00051  | 0.00079  | 0.00054  | 0.00064  |
| GM3 d18:1/22:0 | 0.00166  | 0.00246  | 0.00247  | 0.00242  | 0.00249  | 0.00249  | 0.00510  | 0.00548  | 0.00547  | 0.00506  | 0.00565  | 0.00582  |
| GM3 d18:0/22:0 | 0.00045  | 0.00050  | 0.00055  | 0.00057  | 0.00060  | 0.00043  | 0.00094  | 0.00144  | 0.00112  | 0.00143  | 0.00122  | 0.00152  |
| GM3 d18:1/24:1 | 0.00211  | 0.00217  | 0.00195  | 0.00250  | 0.00219  | 0.00220  | 0.00501  | 0.00515  | 0.00564  | 0.00518  | 0.00485  | 0.00585  |
| GM3 d18:1/24:0 | 0.00529  | 0.00543  | 0.00552  | 0.00588  | 0.00518  | 0.00608  | 0.00939  | 0.01160  | 0.01070  | 0.01046  | 0.00996  | 0.01223  |
| GM3 d18:0/24:0 | 0.00103  | 0.00127  | 0.00120  | 0.00141  | 0.00103  | 0.00121  | 0.00226  | 0.00259  | 0.00222  | 0.00214  | 0.00199  | 0.00267  |
| TAG            | 0.74041  | 0.86234  | 0.92850  | 0.88459  | 0.85823  | 0.92562  | 2.04578  | 1.96868  | 2.03153  | 1.89711  | 1.93182  | 1.96948  |
| DAG            | 1.93708  | 2.37895  | 2.13338  | 2.00351  | 2.12810  | 2.22923  | 2.44802  | 2.52727  | 2.75896  | 2.68521  | 2.56150  | 2.53478  |
| CE             | 0.23076  | 0.20924  | 0.21494  | 0.20708  | 0.29193  | 0.21202  | 4.73970  | 5.08691  | 4.77779  | 5.23206  | 5.14568  | 5.82499  |
| Cho            | 9.59212  | 11.30316 | 10.11699 | 11.03318 | 10.89129 | 10.93784 | 10.86893 | 12.38159 | 11.65014 | 11.97486 | 11.62947 | 12.06884 |
| FFA            | 9.89609  | 10.57093 | 10.32785 | 10.39291 | 10.69159 | 9.86257  | 14.41126 | 14.58745 | 14.44766 | 12.86914 | 13.85573 | 14.91702 |
| PC             | 11.20217 | 9.97291  | 10.54672 | 12.61381 | 13.87284 | 8.91596  | 9.47687  | 14.26460 | 10.24156 | 7.08691  | 10.89575 | 9.53291  |
| PCe/p          | 0.31471  | 0.27644  | 0.29493  | 0.35945  | 0.42129  | 0.32860  | 0.50282  | 0.70767  | 0.54479  | 0.49696  | 0.61956  | 0.51882  |
| PE             | 2.26068  | 2.97779  | 2.77196  | 2.52641  | 2.55950  | 2.22334  | 1.04919  | 1.39174  | 1.50911  | 1.38284  | 1.47239  | 1.38956  |
| PG             | 0.07894  | 0.05814  | 0.06167  | 0.07851  | 0.07578  | 0.07450  | 0.06749  | 0.07389  | 0.07046  | 0.05271  | 0.06767  | 0.06426  |
| PA             | 0.00910  | 0.01109  | 0.01256  | 0.01045  | 0.01161  | 0.01192  | 0.00735  | 0.00781  | 0.00718  | 0.00773  | 0.00729  | 0.00787  |
| PS             | 2.42494  | 3.10508  | 2.76363  | 2.82664  | 2.77785  | 2.87491  | 1.96315  | 2.10299  | 1.96336  | 1.93006  | 1.95417  | 2.02248  |
| PI             | 0.30230  | 0.31387  | 0.32678  | 0.34239  | 0.38118  | 0.40632  | 0.34714  | 0.33720  | 0.39377  | 0.35183  | 0.32434  | 0.35545  |



|        |         |         |         |         |         |         |         |         |         |          |         |         |
|--------|---------|---------|---------|---------|---------|---------|---------|---------|---------|----------|---------|---------|
| LBPA   | 0.01665 | 0.02009 | 0.02014 | 0.02161 | 0.02497 | 0.03040 | 0.06512 | 0.06766 | 0.06119 | 0.08394  | 0.06929 | 0.06342 |
| LPC    | 0.61907 | 0.78254 | 0.73267 | 0.83756 | 0.75503 | 0.83868 | 0.78172 | 0.75833 | 0.77168 | 0.83970  | 0.72163 | 0.68935 |
| LPE    | 0.09745 | 0.10908 | 0.10981 | 0.11317 | 0.11423 | 0.11598 | 0.09453 | 0.10655 | 0.09950 | 0.10233  | 0.09148 | 0.10667 |
| LPS    | 0.02515 | 0.03314 | 0.03285 | 0.03317 | 0.03352 | 0.03389 | 0.03036 | 0.03083 | 0.02936 | 0.03068  | 0.03048 | 0.03361 |
| LPA    | 0.00086 | 0.00110 | 0.00109 | 0.00109 | 0.00122 | 0.00116 | 0.00095 | 0.00109 | 0.00098 | 0.00113  | 0.00113 | 0.00107 |
| LPI    | 0.04168 | 0.05334 | 0.05248 | 0.05195 | 0.05154 | 0.05122 | 0.04610 | 0.04426 | 0.04530 | 0.04321  | 0.04200 | 0.04477 |
| SM     | 5.52056 | 6.05647 | 4.43333 | 6.75744 | 3.88025 | 6.60621 | 4.11895 | 4.68685 | 6.53676 | 17.64339 | 5.26112 | 4.63447 |
| Cer    | 0.09093 | 0.03949 | 0.11957 | 0.03860 | 0.06535 | 0.04823 | 0.20771 | 0.09395 | 0.28896 | 0.33159  | 0.07342 | 0.11053 |
| GluCer | 0.14230 | 0.20811 | 0.21916 | 0.21137 | 0.34544 | 0.25319 | 0.16976 | 0.14817 | 0.16929 | 0.15684  | 0.18616 | 0.16650 |
| Gb3    | 0.00882 | 0.01883 | 0.04257 | 0.02598 | 0.01467 | 0.03260 | 0.01402 | 0.01410 | 0.01608 | 0.01558  | 0.01229 | 0.01289 |
| GM3    | 0.01529 | 0.01714 | 0.01684 | 0.01861 | 0.01671 | 0.01847 | 0.03279 | 0.03927 | 0.03733 | 0.03590  | 0.03538 | 0.04218 |
